# Supplementary material for: Association of ultra-processed food consumption with all cause and cause specific mortality: population based cohort study
Source: PubMed Central journal article supplement — BMJ. 2024 May 8;385:e078476. doi: 10.1136/bmj-2023-078476 (PMC11077436; doi:10.1136/bmj-2023-078476), 2024-05-08

## Supplementary Material

### Association of ultra-processed food consumption with all cause and cause specific mortality: population-based cohort study

**Table A.** The percentage of missness in exposure and covariates in our cohorts

**Table B.** List of food items comprising the nine ultra-processed food subgroups

**Table C.** Pearson correlation coefficients among the nine ultra-processed food (UPF) subgroups (serving/day)

**Table D.** Multivariable hazard ratios and 95% confidence intervals for mortality according to quarters of consumption of selected individual ultra-processed food categories (serving/day)

**Table E.** Hazard ratios and 95% confidence intervals for mortality according to quarters of ultra-processed food consumption (serving/day) in each cohort

**Table F.** Multivariable hazard ratios and 95% confidence intervals for mortality according to quarters of ultra-processed food consumption (serving/day) in the sensitivity analyses

**Table G.** Multivariable hazard ratios and 95% confidence intervals for total mortality associated with ultra-processed food consumption (serving/day) stratified by lifestyle factors

**Table H.** Hazard ratios and 95% confidence intervals for mortality according to quarters of ultra-processed food consumption (% of energy)

**Figure A.** Flow chart of study participants

**Figure B.** The relative contribution of each subgroup to total ultra-processed food consumption (serving/day, % of energy)

**Figure C.** Restricted cubic spline analysis of ultra-processed food consumption (serving/day) and mortality

**Figure D.** The trend of energy-adjusted ultra-processed food consumption (serving/day) by year

**Figure E.** The trend of energy-adjusted consumption of ultra-processed food subgroups (serving/day) by year

**Supplementary Table A. The percentage of missness in exposure and covariates in our cohorts**

| <b>Variables</b>                        | <b>Health Professional Follow-up Study</b><br>(No. of person-years = 542 076) | <b>Nurses' Health Study</b><br>(No. of person-years = 1 134 626) |
|-----------------------------------------|-------------------------------------------------------------------------------|------------------------------------------------------------------|
| Ultra-processed foods                   | 0                                                                             | 0                                                                |
| Ultra-processed subgroups <sup>a</sup>  | <0.1%                                                                         | 0.2%                                                             |
| Age                                     | 0                                                                             | 0                                                                |
| Sex                                     | 0                                                                             | 0                                                                |
| Race/ethnicity                          | 0                                                                             | 0                                                                |
| Marrital status                         | 0                                                                             | 0                                                                |
| Body mass index                         | 0.3%                                                                          | <0.1%                                                            |
| Total physical activity                 | <0.1%                                                                         | 3.2%                                                             |
| Alcohol drinking                        | 0                                                                             | 0                                                                |
| AHEI score                              | 0                                                                             | 0                                                                |
| Total energy intake                     | 0                                                                             | 0                                                                |
| Smoking status and packyears            | 4.9%                                                                          | 2.1%                                                             |
| Physical examination for screening      | 0                                                                             | 0                                                                |
| Family history of cancer                | 0                                                                             | 0                                                                |
| Family history of myocardial infarction | 0                                                                             | 0                                                                |
| Family history of diabetes              | 0                                                                             | 0                                                                |

<sup>a</sup> a) ultra-processed breads and breakfast foods, b) fat, condiments, and sauces, c) packaged sweet snacks and desserts, d) sugar and artificially sweetened beverages, e) ready-to-eat/heat mixed dishes, f) meat/poultry/seafood based ready-to-eat products, g) packaged savory snacks, h) dairy-based desserts, i) other.

**Supplementary Table B. List of food items comprising the nine ultra-processed food subgroups**

| Ultra-processed food subgroups                      | List of food items <sup>a</sup>                                                                                                                                                                                                                                                                                                                         |
|-----------------------------------------------------|---------------------------------------------------------------------------------------------------------------------------------------------------------------------------------------------------------------------------------------------------------------------------------------------------------------------------------------------------------|
| 1. Ultra-processed breads and breakfast foods       | Whole grain (cold breakfast cereal; rye, pumpernickel bread; whole grain bread) <sup>b</sup> ; English muffins, bagels, rolls; White bread                                                                                                                                                                                                              |
| 2. Sauces, spreads, and condiments                  | Cream cheese, Ketchup, Margarine, Mayonnaise (regular and low fat), Non-dairy coffee whitener, Red chili sauce, Salad dressings, Salsa, Soy sauce, Spread butter                                                                                                                                                                                        |
| 3. Packaged sweet snacks and desserts               | Apple sauce; Candy bar with chocolate; Candy bar without chocolate; Chocolate bars; Dark chocolate bars; Breakfast bar; Energy bar; High protein, low carb candy bar; Brownies; Cookies; Fat-free/reduced fat doughnuts; Muffins or biscuits; Ready-made cake; Ready-made sweet rolls and coffee cakes; Ready-made pie; Jams, jellies, preserves, honey |
| 4. Packaged savory snacks                           | Fat-free popcorn; Fat-free, light crackers; Regular crackers                                                                                                                                                                                                                                                                                            |
| 5. Sugar and artificially sweetened beverages       | Regular carbonated beverage with caffeine & sugar; Carbonated, low-cal 'diet' beverage with caffeine; Carbonated beverage without caffeine but with sugar; Fruit drinks/pouch, lemonade, Sunny D, Koolaid, sugared ice tea or other non-carbonated fruit drink – NOT juice                                                                              |
| 6. Meat/poultry/seafood-based ready-to-eat products | Bacon; Beef hotdogs or pork hotdogs; Breaded fish cakes, pieces, sticks; Chicken hotdogs or turkey hotdogs; Processed meats, sausages; Salami, bologna, processed meat sandwiches                                                                                                                                                                       |
| 7. Ready-to-eat/heat mixed dishes                   | Chowder or cream soup, French fries potatoes, Pizza, Ready-made soup from cans, Soup made with bouillon                                                                                                                                                                                                                                                 |
| 8. Dairy based desserts                             | Artificially sweetened yogurt; Flavored yogurt without Nutrasweet; Frozen yogurt, ice cream, sherbet                                                                                                                                                                                                                                                    |
| 9. Other ultra-processed foods                      | Nutrasweet or equal, Other artificial sweeteners, Splenda, Distilled alcohol <sup>c</sup>                                                                                                                                                                                                                                                               |

<sup>a</sup> This list is derived from the nutrient lines of food items included in the food frequency questionnaires. The food frequency questionnaires can be accessed via the public links: <https://nurseshealthstudy.org/participants/questionnaires>; <https://www.hsph.harvard.edu/hpfs/hpfs-questionnaires/>.

<sup>b</sup> Whole grain (Cold breakfast cereal; Rye, pumpernickel bread; Whole grain bread) was excluded from total ultra-processed foods and the subgroup 'ultra-processed breads and breakfast foods' in the primary analysis.

<sup>c</sup> Distilled alcohol was excluded from total ultra-processed foods and the subgroup 'Other ultra-processed foods' in the primary analysis.

**Supplementary Table C. Pearson correlation coefficients among the nine ultra-processed food (UPF) subgroups (serving/day)**

|                                                  | Total UPF | Ultra-processed breads and breakfast foods | Sauces, spreads, and condiments | Packaged sweet snacks and desserts | Packaged savory snacks | Sugar and artificially sweetened beverages | Meat/poultry/seafood-based ready-to-eat products | Ready-to-eat/heat mixed dishes | Dairy based desserts | Other |
|--------------------------------------------------|-----------|--------------------------------------------|---------------------------------|------------------------------------|------------------------|--------------------------------------------|--------------------------------------------------|--------------------------------|----------------------|-------|
| Total UPF                                        | 1         |                                            |                                 |                                    |                        |                                            |                                                  |                                |                      |       |
| Ultra-processed breads and breakfast foods       | 0.416     | 1                                          |                                 |                                    |                        |                                            |                                                  |                                |                      |       |
| Sauces, spreads, and condiments                  | 0.608     | 0.121                                      | 1                               |                                    |                        |                                            |                                                  |                                |                      |       |
| Packaged sweet snacks and desserts               | 0.418     | 0.088                                      | 0.029                           | 1                                  |                        |                                            |                                                  |                                |                      |       |
| Packaged savory snacks                           | 0.265     | 0.005                                      | 0.029                           | 0.065                              | 1                      |                                            |                                                  |                                |                      |       |
| Sugar and artificially sweetened beverages       | 0.543     | 0.053                                      | 0.036                           | 0.035                              | 0.018                  | 1                                          |                                                  |                                |                      |       |
| Meat/poultry/seafood-based ready-to-eat products | 0.257     | 0.145                                      | 0.073                           | 0.038                              | -0.016                 | 0.1                                        | 1                                                |                                |                      |       |
| Ready-to-eat/heat mixed dishes                   | 0.191     | 0.055                                      | 0.005                           | 0.052                              | -0.019                 | 0.159                                      | 0.214                                            | 1                              |                      |       |
| Dairy based desserts                             | 0.129     | -0.054                                     | -0.027                          | 0.111                              | 0.0009                 | 0.033                                      | -0.048                                           | -0.028                         | 1                    |       |
| Other                                            | 0.297     | 0.004                                      | 0.119                           | 0.012                              | 0.005                  | 0.117                                      | 0.004                                            | -0.039                         | 0.039                | 1     |

**Supplementary Table D. Multivariable hazard ratios and 95% confidence intervals for mortality according to quarters of consumption of selected individual ultra-processed food categories (serving/day)**

|                                  | Energy-adjusted ultra-processed food consumption (serving/day) <sup>a</sup> |                   |                   |                   | P for trend | Per difference in medians between quarters 4 and 1 |
|----------------------------------|-----------------------------------------------------------------------------|-------------------|-------------------|-------------------|-------------|----------------------------------------------------|
|                                  | Quarter 1                                                                   | Quarter 2         | Quarter 3         | Quarter 4         |             |                                                    |
| <b>Total mortality</b>           |                                                                             |                   |                   |                   |             |                                                    |
| Ultra-processed whole grains     | 1                                                                           | 1.02 (0.99, 1.05) | 1.01 (0.98, 1.04) | 0.96 (0.93, 0.98) | <0.0001     | 0.95 (0.92, 0.97)                                  |
| Sugar sweetened beverages        | 1                                                                           | 1.03 (1.00, 1.05) | 1.07 (1.04, 1.09) | 1.11 (1.08, 1.14) | <0.0001     | 1.11 (1.08, 1.03)                                  |
| Artificially sweetened beverages | 1                                                                           | 1.01 (0.98, 1.03) | 1.03 (1.00, 1.06) | 1.04 (1.01, 1.06) | 0.01        | 1.03 (1.01, 1.06)                                  |
| Ultra-processed yogurt           | 1                                                                           | 1.10 (1.07, 1.13) | 1.09 (1.06, 1.12) | 1.09 (1.06, 1.12) | <0.001      | 1.03 (1.02, 1.05)                                  |
| Ice cream/sherbet                | 1                                                                           | 1.02 (0.99, 1.05) | 1.04 (1.02, 1.07) | 1.05 (1.02, 1.08) | 0.0003      | 1.05 (1.02, 1.07)                                  |
| Dark chocolate bars              | 1                                                                           | 1.00 (0.97, 1.03) | 0.95 (0.92, 0.97) | 0.96 (0.94, 0.99) | 0.002       | 0.96 (0.94, 0.99)                                  |
| <b>Cancer mortality</b>          |                                                                             |                   |                   |                   |             |                                                    |
| Ultra-processed whole grains     | 1                                                                           | 1.03 (0.98, 1.08) | 1.04 (0.99, 1.09) | 0.97 (0.92, 1.02) | 0.14        | 0.96 (0.92, 1.01)                                  |
| Sugar sweetened beverages        | 1                                                                           | 1.07 (1.02, 1.12) | 1.08 (1.03, 1.13) | 1.12 (1.07, 1.18) | 0.0001      | 1.09 (1.04, 1.14)                                  |
| Artificially sweetened beverages | 1                                                                           | 1.01 (0.96, 1.05) | 1.00 (0.95, 1.04) | 0.97 (0.92, 1.02) | 0.10        | 0.96 (0.92, 1.01)                                  |
| Ultra-processed yogurt           | 1                                                                           | 1.13 (1.08, 1.19) | 1.14 (1.08, 1.21) | 1.14 (1.08, 1.20) | <0.0001     | 1.06 (1.03, 1.10)                                  |
| Ice cream/sherbet                | 1                                                                           | 1.03 (0.98, 1.08) | 1.01 (0.97, 1.07) | 1.02 (0.97, 1.07) | 0.53        | 1.01 (0.97, 1.06)                                  |
| Dark chocolate bars              | 1                                                                           | 0.98 (0.94, 1.03) | 0.96 (0.92, 1.01) | 0.98 (0.94, 1.03) | 0.42        | 0.98 (0.94, 1.03)                                  |
| <b>Cardiovascular mortality</b>  |                                                                             |                   |                   |                   |             |                                                    |
| Ultra-processed whole grains     | 1                                                                           | 1.03 (0.97, 1.09) | 1.02 (0.96, 1.07) | 0.96 (0.91, 1.01) | 0.02        | 0.94 (0.89, 0.99)                                  |
| Sugar sweetened beverages        | 1                                                                           | 0.99 (0.94, 1.04) | 1.02 (0.97, 1.08) | 1.06 (1.01, 1.12) | 0.005       | 1.08 (1.02, 1.13)                                  |
| Artificially sweetened beverages | 1                                                                           | 0.99 (0.94, 1.04) | 1.04 (0.99, 1.10) | 1.08 (1.02, 1.14) | 0.002       | 1.09 (1.03, 1.15)                                  |
| Ultra-processed yogurt           | 1                                                                           | 1.10 (1.04, 1.16) | 1.13 (1.06, 1.19) | 1.07 (1.01, 1.13) | 0.14        | 1.02 (0.99, 1.05)                                  |
| Ice cream/sherbet                | 1                                                                           | 0.99 (0.93, 1.04) | 1.02 (0.97, 1.08) | 0.95 (0.90, 1.00) | 0.03        | 0.94 (0.90, 0.99)                                  |
| Dark chocolate bars              | 1                                                                           | 1.02 (0.97, 1.08) | 0.96 (0.91, 1.02) | 0.94 (0.89, 0.99) | 0.009       | 0.93 (0.89, 0.98)                                  |
| <b>Other mortality</b>           |                                                                             |                   |                   |                   |             |                                                    |
| Ultra-processed whole grains     | 1                                                                           | 1.01 (0.97, 1.05) | 1.00 (0.96, 1.04) | 0.96 (0.92, 0.99) | 0.004       | 0.94 (0.91, 0.98)                                  |
| Sugar sweetened beverages        | 1                                                                           | 1.02 (0.98, 1.06) | 1.08 (1.04, 1.12) | 1.13 (1.09, 1.17) | <0.0001     | 1.13 (1.09, 1.17)                                  |
| Artificially sweetened beverages | 1                                                                           | 1.02 (0.98, 1.05) | 1.04 (1.00, 1.08) | 1.06 (1.02, 1.10) | 0.006       | 1.06 (1.02, 1.10)                                  |
| Ultra-processed yogurt           | 1                                                                           | 1.11 (1.07, 1.15) | 1.06 (1.02, 1.10) | 1.09 (1.05, 1.14) | 0.004       | 1.03 (1.01, 1.05)                                  |
| Ice cream/sherbet                | 1                                                                           | 1.03 (0.99, 1.07) | 1.07 (1.03, 1.12) | 1.12 (1.08, 1.16) | <0.0001     | 1.12 (1.08, 1.17)                                  |

---

|                     |   |                   |                   |                   |      |                   |
|---------------------|---|-------------------|-------------------|-------------------|------|-------------------|
| Dark chocolate bars | 1 | 1.00 (0.96, 1.03) | 0.93 (0.90, 0.97) | 0.96 (0.92, 0.99) | 0.03 | 0.96 (0.93, 1.00) |
|---------------------|---|-------------------|-------------------|-------------------|------|-------------------|

<sup>a</sup> The quarter-specific medians (serving/day) for each category: ultra-processed whole grains, 0.3, 0.7, 1.0, 1.8; sugar sweetened beverages, 0.01, 0.06, 0.2, 0.6; artificially sweetened beverages, 0.01, 0.08, 0.4, 1.3; ultra-processed yogurt, 0.009, 0.01, 0.01, 0.08; ice cream/sherbet, 0.05, 0.1, 0.2, 0.4; dark chocolate bars, 0, 0.04, 0.07, 0.22.

**Supplementary Table E. Hazard ratios and 95% confidence intervals for mortality according to quarters of ultra-processed food consumption (serving/day) in each cohort**

|                                 | Energy-adjusted ultra-processed food consumption (serving/day) |                   |                   |                   | <i>P</i> for trend | Per difference in medians between quarters 4 and 1 |
|---------------------------------|----------------------------------------------------------------|-------------------|-------------------|-------------------|--------------------|----------------------------------------------------|
|                                 | Quarter 1                                                      | Quarter 2         | Quarter 3         | Quarter 4         |                    |                                                    |
| <b>HPFS</b>                     |                                                                |                   |                   |                   |                    |                                                    |
| <b>Median intake (IQR)</b>      | 3.2 (1.1)                                                      | 4.6 (0.7)         | 5.9 (0.7)         | 8.0 (2.0)         |                    |                                                    |
| <b>Total mortality</b>          |                                                                |                   |                   |                   |                    |                                                    |
| Number of cases                 | 4491                                                           | 4423              | 4572              | 4519              |                    |                                                    |
| Model 1 <sup>a</sup>            | 1                                                              | 1.04 (0.99, 1.08) | 1.07 (1.02, 1.11) | 1.18 (1.13, 1.23) | <0.0001            | 1.18 (1.13, 1.23)                                  |
| Model 2 <sup>b</sup>            | 1                                                              | 1.07 (1.02, 1.11) | 1.07 (1.03, 1.12) | 1.07 (1.02, 1.12) | 0.007              | 1.06 (1.02, 1.11)                                  |
| <b>Cancer mortality</b>         |                                                                |                   |                   |                   |                    |                                                    |
| Number of cases                 | 1317                                                           | 1265              | 1 375             | 1347              |                    |                                                    |
| Model 1 <sup>a</sup>            | 1                                                              | 1.01 (0.94, 1.10) | 1.10 (1.02, 1.19) | 1.15 (1.06, 1.24) | <0.0001            | 1.17 (1.08, 1.26)                                  |
| Model 2 <sup>b</sup>            | 1                                                              | 1.03 (0.95, 1.12) | 1.09 (1.01, 1.17) | 1.04 (0.96, 1.13) | 0.26               | 1.05 (0.97, 1.13)                                  |
| <b>Cardiovascular mortality</b> |                                                                |                   |                   |                   |                    |                                                    |
| Number of cases                 | 1284                                                           | 1328              | 1289              | 1315              |                    |                                                    |
| Model 1 <sup>a</sup>            | 1                                                              | 1.09 (1.00, 1.18) | 1.05 (0.97, 1.14) | 1.22 (1.13, 1.32) | <0.0001            | 1.21 (1.12, 1.31)                                  |
| Model 2 <sup>b</sup>            | 1                                                              | 1.09 (1.01, 1.18) | 1.02 (0.94, 1.11) | 1.06 (0.98, 1.15) | 0.37               | 1.04 (0.96, 1.13)                                  |
| <b>Other mortality</b>          |                                                                |                   |                   |                   |                    |                                                    |
| Number of cases                 | 1890                                                           | 1830              | 1908              | 1857              |                    |                                                    |
| Model 1 <sup>a</sup>            | 1                                                              | 1.02 (0.95, 1.09) | 1.05 (0.99, 1.13) | 1.16 (1.09, 1.24) | <0.0001            | 1.17 (1.10, 1.25)                                  |
| Model 2 <sup>b</sup>            | 1                                                              | 1.07 (1.00, 1.15) | 1.09 (1.02, 1.17) | 1.09 (1.02, 1.17) | 0.01               | 1.09 (1.02, 1.17)                                  |
| <b>Respiratory</b>              |                                                                |                   |                   |                   |                    |                                                    |
| Number of cases                 | 339                                                            | 328               | 382               | 380               |                    |                                                    |
| Model 1 <sup>a</sup>            | 1                                                              | 1.01 (0.86, 1.18) | 1.15 (0.99, 1.33) | 1.33 (1.15, 1.55) | <0.0001            | 1.38 (1.18, 1.60)                                  |
| Model 2 <sup>b</sup>            | 1                                                              | 1.00 (0.86, 1.18) | 1.13 (0.97, 1.32) | 1.07 (0.91, 1.25) | 0.24               | 1.10 (0.94, 1.29)                                  |
| <b>Neurodegenerative</b>        |                                                                |                   |                   |                   |                    |                                                    |
| Number of cases                 | 392                                                            | 401               | 381               | 344               |                    |                                                    |
| Model 1 <sup>a</sup>            | 1                                                              | 1.08 (0.94, 1.25) | 1.03 (0.89, 1.20) | 1.11 (0.96, 1.29) | 0.27               | 1.09 (0.94, 1.27)                                  |
| Model 2 <sup>b</sup>            | 1                                                              | 1.20 (1.03, 1.39) | 1.11 (0.95, 1.29) | 1.16 (0.99, 1.35) | 0.14               | 1.12 (0.96, 1.31)                                  |
| <b>NHS</b>                      |                                                                |                   |                   |                   |                    |                                                    |

|                                 |           |                   |                   |                   |         |                   |
|---------------------------------|-----------|-------------------|-------------------|-------------------|---------|-------------------|
| <b>Median intake (IQR)</b>      | 3.0 (0.9) | 4.2 (0.5)         | 5.3 (0.6)         | 7.1 (1.7)         |         |                   |
| <b>Total mortality</b>          |           |                   |                   |                   |         |                   |
| Number of cases                 | 7371      | 7259              | 7596              | 7962              |         |                   |
| Model 1 <sup>a</sup>            | 1         | 1.07 (1.03, 1.10) | 1.15 (1.11, 1.19) | 1.24 (1.20, 1.28) | <0.0001 | 1.25 (1.21, 1.29) |
| Model 2 <sup>b</sup>            | 1         | 1.03 (1.00, 1.07) | 1.07 (1.04, 1.11) | 1.03 (1.00, 1.06) | 0.08    | 1.03 (1.00, 1.06) |
| <b>Cancer mortality</b>         |           |                   |                   |                   |         |                   |
| Number of cases                 | 2110      | 1995              | 2101              | 2047              |         |                   |
| Model 1 <sup>a</sup>            | 1         | 1.00 (0.94, 1.07) | 1.09 (1.02, 1.16) | 1.07 (1.01, 1.14) | 0.004   | 1.09 (1.03, 1.16) |
| Model 2 <sup>b</sup>            | 1         | 0.98 (0.92, 1.04) | 1.02 (0.96, 1.08) | 0.91 (0.85, 0.97) | 0.08    | 0.96 (0.91, 1.00) |
| <b>Cardiovascular mortality</b> |           |                   |                   |                   |         |                   |
| Number of cases                 | 1533      | 1445              | 1510              | 1712              |         |                   |
| Model 1 <sup>a</sup>            | 1         | 1.05 (0.97, 1.13) | 1.13 (1.05, 1.22) | 1.33 (1.24, 1.42) | <0.0001 | 1.35 (1.26, 1.45) |
| Model 2 <sup>b</sup>            | 1         | 0.99 (0.92, 1.06) | 1.01 (0.94, 1.08) | 1.04 (0.97, 1.12) | 0.20    | 1.05 (0.98, 1.13) |
| <b>Other mortality</b>          |           |                   |                   |                   |         |                   |
| Number of cases                 | 3728      | 3819              | 3985              | 4203              |         |                   |
| Model 1 <sup>a</sup>            | 1         | 1.11 (1.06, 1.16) | 1.19 (1.14, 1.24) | 1.30 (1.24, 1.36) | <0.0001 | 1.31 (1.25, 1.37) |
| Model 2 <sup>b</sup>            | 1         | 1.08 (1.03, 1.13) | 1.13 (1.08, 1.18) | 1.10 (1.05, 1.15) | 0.0002  | 1.09 (1.04, 1.14) |
| <b>Respiratory</b>              |           |                   |                   |                   |         |                   |
| Number of cases                 | 541       | 594               | 629               | 733               |         |                   |
| Model 1 <sup>a</sup>            | 1         | 1.21 (1.07, 1.36) | 1.31 (1.16, 1.47) | 1.58 (1.42, 1.77) | <0.0001 | 1.59 (1.42, 1.78) |
| Model 2 <sup>b</sup>            | 1         | 1.08 (0.96, 1.22) | 1.09 (0.97, 1.23) | 1.11 (0.99, 1.25) | 0.11    | 1.10 (0.98, 1.23) |
| <b>Neurodegenerative</b>        |           |                   |                   |                   |         |                   |
| Number of cases                 | 1241      | 1252              | 1194              | 1138              |         |                   |
| Model 1 <sup>a</sup>            | 1         | 1.11 (1.02, 1.20) | 1.09 (1.01, 1.18) | 1.09 (1.01, 1.18) | 0.07    | 1.08 (0.99, 1.17) |
| Model 2 <sup>b</sup>            | 1         | 1.16 (1.07, 1.26) | 1.15 (1.06, 1.25) | 1.07 (0.99, 1.17) | 0.23    | 1.05 (0.97, 1.14) |

Abbreviation: HPFS, Health Professionals Follow-up Study; IQR, interquartile range; NHS, Nurses' Health Study

<sup>a</sup> Stratified by age (months) and questionnaire cycle (two-year interval) and adjusted for total energy intake.

<sup>b</sup> Further adjusted for categorical covariates including race, marital status, physical activity, body mass index, smoking status and packyears, alcohol consumption, physical examination performed for screening purposes, family history of diabetes mellitus, myocardial infarction, or cancer; for women, also menopausal status and hormone use.



**Supplementary Table F. Multivariable hazard ratios and 95% confidence intervals for mortality according to quarters of ultra-processed food consumption (serving/day) in the sensitivity analyses**

|                                                                                                                                                                  | Energy-adjusted ultra-processed food consumption (serving/day) |                   |                   |                   | P for trend | Per difference in medians between quarter 4 and 1 |
|------------------------------------------------------------------------------------------------------------------------------------------------------------------|----------------------------------------------------------------|-------------------|-------------------|-------------------|-------------|---------------------------------------------------|
|                                                                                                                                                                  | Quarter 1                                                      | Quarter 2         | Quarter 3         | Quarter 4         |             |                                                   |
| <b>Stop updating diet after diagnosis of cardiovascular diseases (myocardial infarction, stroke, angina, coronary artery bypass graft), cancer, and diabetes</b> |                                                                |                   |                   |                   |             |                                                   |
| Total mortality                                                                                                                                                  | 1                                                              | 1.00 (0.97, 1.02) | 1.01 (0.98, 1.03) | 0.99 (0.96, 1.01) | 0.37        | 0.99 (0.96, 1.01)                                 |
| Cancer mortality                                                                                                                                                 | 1                                                              | 0.97 (0.92, 1.02) | 0.96 (0.92, 1.01) | 0.92 (0.88, 0.97) | 0.001       | 0.92 (0.88, 0.97)                                 |
| Cardiovascular mortality                                                                                                                                         | 1                                                              | 0.97 (0.92, 1.03) | 0.95 (0.90, 1.00) | 0.96 (0.91, 1.02) | 0.16        | 0.96 (0.91, 1.02)                                 |
| Other mortality                                                                                                                                                  | 1                                                              | 1.03 (0.99, 1.07) | 1.07 (1.03, 1.11) | 1.04 (1.00, 1.08) | 0.04        | 1.04 (1.00, 1.08)                                 |
| Respiratory mortality                                                                                                                                            | 1                                                              | 0.99 (0.90, 1.09) | 1.04 (0.95, 1.15) | 1.05 (0.96, 1.15) | 0.19        | 1.06 (0.97, 1.16)                                 |
| Neurodegenerative mortality                                                                                                                                      | 1                                                              | 1.11 (1.03, 1.19) | 1.09 (1.02, 1.17) | 1.06 (0.99, 1.14) | 0.20        | 1.05 (0.97, 1.13)                                 |
| <b>8-year lag between UPF measurement and outcome risk</b>                                                                                                       |                                                                |                   |                   |                   |             |                                                   |
| Total mortality                                                                                                                                                  | 1                                                              | 1.01 (0.98, 1.03) | 1.04 (1.01, 1.07) | 1.02 (0.99, 1.05) | 0.10        | 1.02 (1.00, 1.05)                                 |
| Cancer mortality                                                                                                                                                 | 1                                                              | 0.96 (0.91, 1.01) | 1.01 (0.96, 1.06) | 0.94 (0.89, 0.99) | 0.05        | 0.95 (0.91, 1.00)                                 |
| Cardiovascular mortality                                                                                                                                         | 1                                                              | 1.02 (0.97, 1.08) | 1.01 (0.96, 1.07) | 1.04 (0.98, 1.10) | 0.22        | 1.03 (0.98, 1.09)                                 |
| Other mortality                                                                                                                                                  | 1                                                              | 1.03 (0.99, 1.07) | 1.07 (1.03, 1.12) | 1.06 (1.02, 1.10) | 0.002       | 1.06 (1.02, 1.10)                                 |
| Respiratory mortality                                                                                                                                            | 1                                                              | 1.02 (0.93, 1.12) | 1.08 (0.98, 1.18) | 1.05 (0.95, 1.15) | 0.28        | 1.05 (0.96, 1.15)                                 |
| Neurodegenerative mortality                                                                                                                                      | 1                                                              | 1.08 (1.01, 1.16) | 1.09 (1.02, 1.17) | 1.06 (0.99, 1.14) | 0.14        | 1.06 (0.98, 1.14)                                 |
| <b>Adjust for smoking status (never, former, current) rather than smoking status and packyears</b>                                                               |                                                                |                   |                   |                   |             |                                                   |
| Total mortality                                                                                                                                                  | 1                                                              | 1.06 (1.03, 1.09) | 1.09 (1.07, 1.12) | 1.09 (1.07, 1.12) | <0.0001     | 1.09 (1.06, 1.12)                                 |
| Cancer mortality                                                                                                                                                 | 1                                                              | 1.02 (0.97, 1.07) | 1.07 (1.02, 1.13) | 1.01 (0.96, 1.06) | 0.44        | 1.02 (0.97, 1.07)                                 |
| Cardiovascular mortality                                                                                                                                         | 1                                                              | 1.05 (0.99, 1.10) | 1.03 (0.97, 1.08) | 1.09 (1.03, 1.15) | 0.004       | 1.08 (1.02, 1.14)                                 |
| Other mortality                                                                                                                                                  | 1                                                              | 1.10 (1.05, 1.14) | 1.14 (1.10, 1.18) | 1.14 (1.10, 1.19) | <0.0001     | 1.14 (1.10, 1.18)                                 |
| Respiratory mortality                                                                                                                                            | 1                                                              | 1.12 (1.02, 1.23) | 1.19 (1.08, 1.31) | 1.27 (1.15, 1.39) | <0.0001     | 1.27 (1.16, 1.39)                                 |
| Neurodegenerative mortality                                                                                                                                      | 1                                                              | 1.17 (1.09, 1.25) | 1.14 (1.06, 1.23) | 1.10 (1.02, 1.18) | 0.008       | 1.10 (1.03, 1.19)                                 |
| <b>Not adjust for BMI</b>                                                                                                                                        |                                                                |                   |                   |                   |             |                                                   |

|                                                                                               |   |                   |                   |                   |         |                   |
|-----------------------------------------------------------------------------------------------|---|-------------------|-------------------|-------------------|---------|-------------------|
| Total mortality                                                                               | 1 | 1.04 (1.01, 1.07) | 1.07 (1.04, 1.10) | 1.05 (1.02, 1.08) | 0.0007  | 1.05 (1.02, 1.07) |
| Cancer mortality                                                                              | 1 | 1.00 (0.95, 1.04) | 1.04 (0.99, 1.09) | 0.96 (0.91, 1.00) | 0.12    | 0.96 (0.92, 1.01) |
| Cardiovascular mortality                                                                      | 1 | 1.05 (0.99, 1.10) | 1.04 (0.98, 1.10) | 1.09 (1.04, 1.15) | 0.002   | 1.09 (1.03, 1.15) |
| Other mortality                                                                               | 1 | 1.07 (1.03, 1.11) | 1.10 (1.06, 1.14) | 1.08 (1.04, 1.12) | <0.0001 | 1.08 (1.04, 1.12) |
| Respiratory mortality                                                                         | 1 | 1.02 (0.93, 1.12) | 1.06 (0.96, 1.16) | 1.04 (0.95, 1.14) | 0.36    | 1.04 (0.95, 1.14) |
| Neurodegenerative mortality                                                                   | 1 | 1.14 (1.06, 1.22) | 1.10 (1.03, 1.19) | 1.04 (0.97, 1.12) | 0.59    | 1.02 (0.95, 1.10) |
| <b>Additionally adjust for AHEI</b>                                                           |   |                   |                   |                   |         |                   |
| Total mortality                                                                               | 1 | 1.03 (1.00, 1.05) | 1.05 (1.02, 1.07) | 1.01 (0.99, 1.04) | 0.54    | 1.01 (0.98, 1.04) |
| Cancer mortality                                                                              | 1 | 1.00 (0.95, 1.05) | 1.04 (0.99, 1.10) | 0.95 (0.90, 1.00) | 0.07    | 0.96 (0.91, 1.00) |
| Cardiovascular mortality                                                                      | 1 | 1.02 (0.97, 1.08) | 1.00 (0.94, 1.05) | 1.03 (0.97, 1.09) | 0.44    | 1.02 (0.97, 1.08) |
| Other mortality                                                                               | 1 | 1.05 (1.01, 1.09) | 1.07 (1.03, 1.12) | 1.04 (1.00, 1.08) | 0.08    | 1.04 (1.00, 1.08) |
| Respiratory mortality                                                                         | 1 | 1.00 (0.91, 1.10) | 1.04 (0.94, 1.14) | 1.00 (0.91, 1.10) | 0.93    | 1.00 (0.91, 1.11) |
| Neurodegenerative mortality                                                                   | 1 | 1.15 (1.07, 1.23) | 1.12 (1.04, 1.20) | 1.07 (0.99, 1.15) | 0.29    | 1.04 (0.96, 1.13) |
| <b>Include whole grain in the total UPF definition</b>                                        |   |                   |                   |                   |         |                   |
| Total mortality                                                                               | 1 | 1.03 (1.00, 1.06) | 1.05 (1.02, 1.07) | 1.01 (0.99, 1.04) | 0.48    | 1.01 (0.98, 1.04) |
| Cancer mortality                                                                              | 1 | 0.98 (0.94, 1.03) | 1.02 (0.97, 1.07) | 0.94 (0.89, 0.99) | 0.02    | 0.94 (0.90, 0.99) |
| Cardiovascular mortality                                                                      | 1 | 1.05 (0.99, 1.11) | 1.02 (0.97, 1.08) | 1.02 (0.97, 1.08) | 0.67    | 1.01 (0.96, 1.07) |
| Other mortality                                                                               | 1 | 1.05 (1.01, 1.09) | 1.08 (1.04, 1.12) | 1.05 (1.01, 1.09) | 0.01    | 1.05 (1.01, 1.09) |
| Respiratory mortality                                                                         | 1 | 1.10 (0.99, 1.21) | 1.02 (0.93, 1.12) | 1.03 (0.94, 1.13) | 0.93    | 1.00 (0.92, 1.10) |
| Neurodegenerative mortality                                                                   | 1 | 1.15 (1.07, 1.24) | 1.17 (1.09, 1.26) | 1.12 (1.04, 1.20) | 0.009   | 1.10 (1.03, 1.19) |
| <b>Include distilled alcohol in the total UPF definition</b>                                  |   |                   |                   |                   |         |                   |
| Total mortality                                                                               | 1 | 1.06 (1.03, 1.09) | 1.09 (1.06, 1.12) | 1.06 (1.03, 1.09) | <0.0001 | 1.06 (1.03, 1.08) |
| Cancer mortality                                                                              | 1 | 1.01 (0.96, 1.07) | 1.05 (1.00, 1.10) | 0.96 (0.91, 1.01) | 0.09    | 0.96 (0.91, 1.01) |
| Cardiovascular mortality                                                                      | 1 | 1.09 (1.03, 1.15) | 1.06 (1.00, 1.12) | 1.08 (1.02, 1.14) | 0.03    | 1.06 (1.01, 1.12) |
| Other mortality                                                                               | 1 | 1.07 (1.03, 1.11) | 1.13 (1.09, 1.17) | 1.12 (1.08, 1.16) | <0.0001 | 1.12 (1.08, 1.16) |
| Respiratory mortality                                                                         | 1 | 1.06 (0.96, 1.17) | 1.09 (0.99, 1.20) | 1.12 (1.02, 1.23) | 0.02    | 1.11 (1.02, 1.22) |
| Neurodegenerative mortality                                                                   | 1 | 1.11 (1.03, 1.19) | 1.11 (1.03, 1.19) | 1.10 (1.03, 1.19) | 0.02    | 1.09 (1.02, 1.17) |
| <b>Include both whole grain and distilled alcohol (i.e., use the standard UPF definition)</b> |   |                   |                   |                   |         |                   |
| Total mortality                                                                               | 1 | 1.04 (1.01, 1.07) | 1.06 (1.04, 1.09) | 1.03 (1.00, 1.06) | 0.06    | 1.03 (1.00, 1.05) |
| Cancer mortality                                                                              | 1 | 1.00 (0.95, 1.05) | 1.02 (0.97, 1.07) | 0.94 (0.90, 0.99) | 0.09    | 0.94 (0.90, 0.99) |
| Cardiovascular mortality                                                                      | 1 | 1.06 (1.00, 1.12) | 1.04 (0.98, 1.10) | 1.04 (0.99, 1.10) | 0.30    | 1.03 (0.98, 1.08) |

|                             |   |                   |                   |                   |         |                   |
|-----------------------------|---|-------------------|-------------------|-------------------|---------|-------------------|
| Other mortality             | 1 | 1.05 (1.01, 1.09) | 1.11 (1.07, 1.15) | 1.08 (1.04, 1.12) | <0.0001 | 1.08 (1.04, 1.12) |
| Respiratory mortality       | 1 | 1.06 (0.96, 1.17) | 1.09 (0.99, 1.20) | 1.15 (0.96, 1.16) | 0.35    | 1.05 (0.95, 1.14) |
| Neurodegenerative mortality | 1 | 1.12 (1.04, 1.20) | 1.14 (1.06, 1.23) | 1.11 (1.03, 1.20) | 0.008   | 1.10 (1.03, 1.19) |

---

Abbreviation: AHEI, alternative Healthy Eating Index; BMI, body mass index; UPF, ultra-processed food

**Supplementary Table G. Multivariable hazard ratios and 95% confidence intervals for total mortality associated with ultra-processed food consumption (serving/day) stratified by lifestyle factors**

| Risk factor                               | Number of cases | Energy-adjusted ultra-processed food consumption<br>(serving/day) |                          |
|-------------------------------------------|-----------------|-------------------------------------------------------------------|--------------------------|
|                                           |                 | Per difference in medians between<br>quarter 4 and 1              | <i>P</i> for interaction |
| <b>Body mass index (kg/m<sup>2</sup>)</b> |                 |                                                                   |                          |
| <25                                       | 24 313          | 1.05 (1.01, 1.09)                                                 | 0.06                     |
| 25-29.9                                   | 17 329          | 1.02 (0.97, 1.06)                                                 |                          |
| ≥30                                       | 6551            | 1.04 (0.96, 1.12)                                                 |                          |
| <b>Physical activity (MET-hr/week)</b>    |                 |                                                                   |                          |
| <7.5                                      | 14 885          | 0.98 (0.93, 1.03)                                                 | 0.14                     |
| 7.5-14.9                                  | 11 590          | 1.04 (0.98, 1.10)                                                 |                          |
| ≥15                                       | 21 718          | 1.04 (1.00, 1.09)                                                 |                          |
| <b>Alcohol (grams/day)</b>                |                 |                                                                   |                          |
| Never                                     | 9981            | 1.06 (1.00, 1.12)                                                 | 0.005                    |
| 0.1-13.9                                  | 28 334          | 1.05 (1.02, 1.09)                                                 |                          |
| ≥14                                       | 9878            | 0.96 (0.90, 1.02)                                                 |                          |
| <b>Smoking status</b>                     |                 |                                                                   |                          |
| Never                                     | 17 867          | 1.05 (1.00, 1.10)                                                 | <0.0001                  |
| Former                                    | 24 353          | 1.03 (0.99, 1.07)                                                 |                          |
| Current                                   | 4240            | 0.91 (0.83, 1.01)                                                 |                          |

**Supplementary Table H. Hazard ratios and 95% confidence intervals for mortality according to quarters of ultra-processed food consumption (% of energy)**

|                                 | Ultra-processed food consumption (% of energy) |                   |                   |                   | P for trend | Per 10% increment |
|---------------------------------|------------------------------------------------|-------------------|-------------------|-------------------|-------------|-------------------|
|                                 | Quarter 1                                      | Quarter 2         | Quarter 3         | Quarter 4         |             |                   |
| <b>Median intake (IQR)</b>      | 16.11 (5.09)                                   | 23.01 (2.85)      | 28.73 (3.09)      | 36.89 (6.85)      |             |                   |
| <b>Total mortality</b>          |                                                |                   |                   |                   |             |                   |
| Model 1 <sup>a</sup>            | 1                                              | 1.07 (1.04, 1.09) | 1.18 (1.15, 1.21) | 1.32 (1.28, 1.35) | <0.0001     | 1.13 (1.12, 1.15) |
| Model 2 <sup>b</sup>            | 1                                              | 1.02 (1.00, 1.05) | 1.08 (1.05, 1.11) | 1.06 (1.03, 1.09) | <0.0001     | 1.03 (1.02, 1.04) |
| <b>Cancer mortality</b>         |                                                |                   |                   |                   |             |                   |
| Model 1 <sup>a</sup>            | 1                                              | 1.04 (0.99, 1.09) | 1.13 (1.08, 1.19) | 1.22 (1.16, 1.28) | <0.0001     | 1.09 (1.07, 1.11) |
| Model 2 <sup>b</sup>            | 1                                              | 1.00 (0.95, 1.05) | 1.03 (0.98, 1.08) | 0.98 (0.94, 1.03) | 0.67        | 1.00 (0.98, 1.02) |
| <b>Cardiovascular mortality</b> |                                                |                   |                   |                   |             |                   |
| Model 1 <sup>a</sup>            | 1                                              | 1.05 (1.00, 1.11) | 1.15 (1.10, 1.22) | 1.23 (1.17, 1.29) | <0.0001     | 1.10 (1.08, 1.12) |
| Model 2 <sup>b</sup>            | 1                                              | 0.99 (0.94, 1.05) | 1.03 (0.98, 1.09) | 0.97 (0.92, 1.02) | 0.56        | 0.99 (0.97, 1.02) |
| <b>Other mortality</b>          |                                                |                   |                   |                   |             |                   |
| Model 1 <sup>a</sup>            | 1                                              | 1.08 (1.05, 1.13) | 1.23 (1.18, 1.27) | 1.42 (1.37, 1.48) | <0.0001     | 1.18 (1.16, 1.20) |
| Model 2 <sup>b</sup>            | 1                                              | 1.05 (1.01, 1.09) | 1.13 (1.09, 1.18) | 1.15 (1.11, 1.19) | <0.0001     | 1.07 (1.05, 1.09) |
| <b>Respiratory</b>              |                                                |                   |                   |                   |             |                   |
| Model 1 <sup>a</sup>            | 1                                              | 1.12 (1.02, 1.23) | 1.35 (1.23, 1.48) | 1.90 (1.74, 2.08) | <0.0001     | 1.33 (1.29, 1.38) |
| Model 2 <sup>b</sup>            | 1                                              | 1.01 (0.92, 1.11) | 1.12 (1.02, 1.23) | 1.28 (1.17, 1.41) | <0.0001     | 1.12 (1.08, 1.16) |
| <b>Neurodegenerative</b>        |                                                |                   |                   |                   |             |                   |
| Model 1 <sup>a</sup>            | 1                                              | 1.09 (1.02, 1.17) | 1.15 (1.07, 1.23) | 1.28 (1.19, 1.37) | <0.0001     | 1.12 (1.09, 1.15) |
| Model 2 <sup>b</sup>            | 1                                              | 1.10 (1.02, 1.18) | 1.13 (1.05, 1.21) | 1.13 (1.05, 1.22) | <0.0001     | 1.07 (1.03, 1.10) |

<sup>a</sup> Stratified by age (months), questionnaire cycle (two-year interval), and cohort.

<sup>b</sup> Further adjusted for categorical covariates including race, marital status, physical activity, body mass index, smoking status and packyears, alcohol consumption, physical examination performed for screening purposes, family history of diabetes mellitus, myocardial infarction, or cancer; for women, also menopausal status and hormone use.

### Supplementary Figure A. Flow chart of study participants

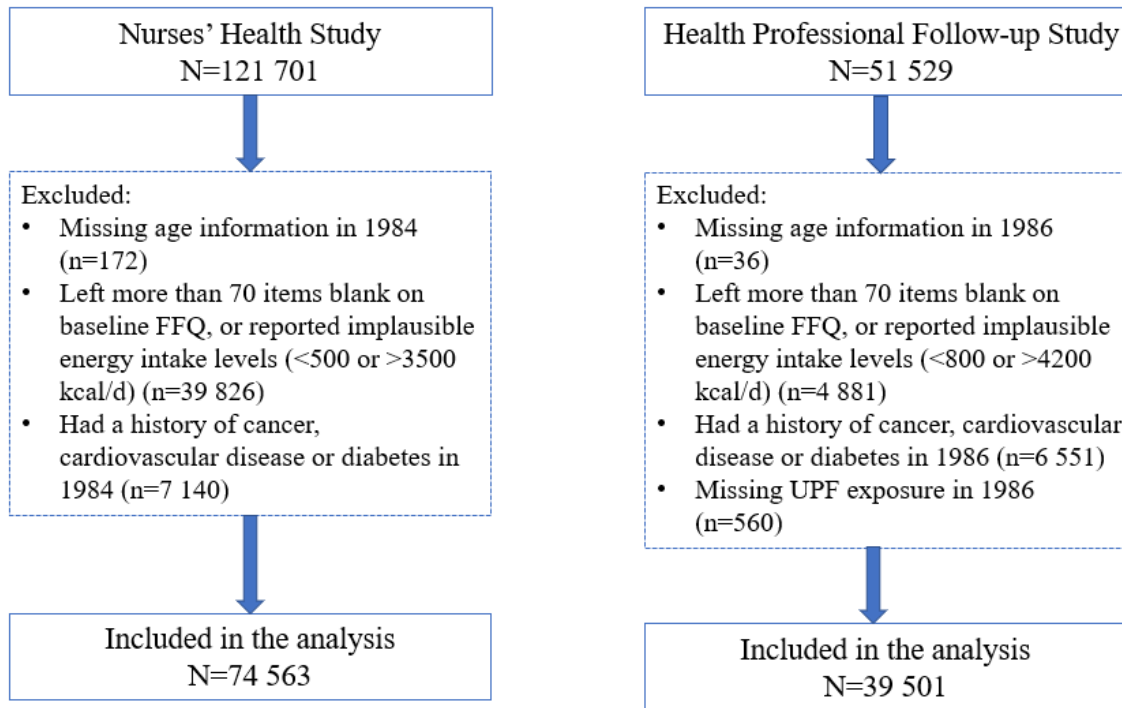

## Supplementary Figure B. The relative contribution of each subgroup to total ultra-processed food consumption

(A) Using servings per day as measurement unit

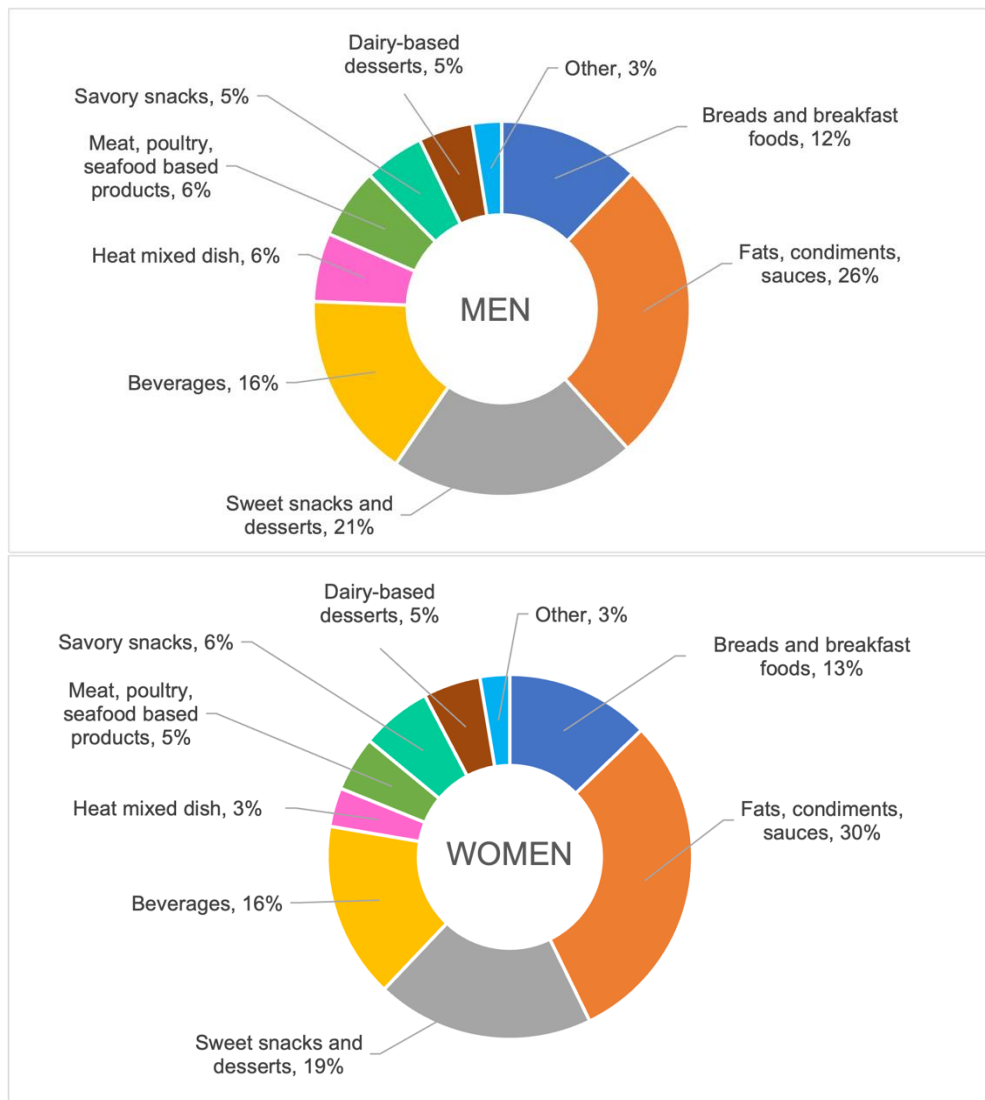

(B) Using % of energy as measurement unit

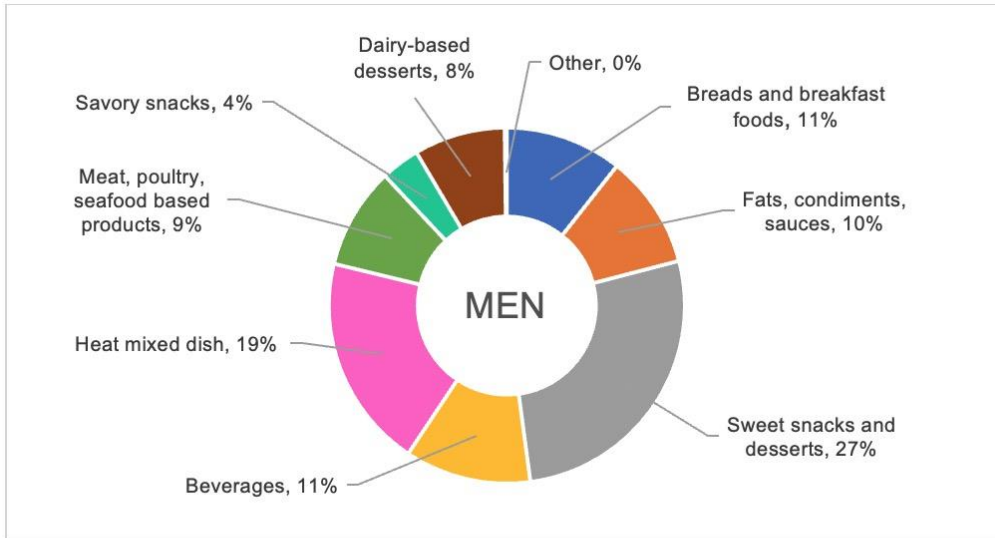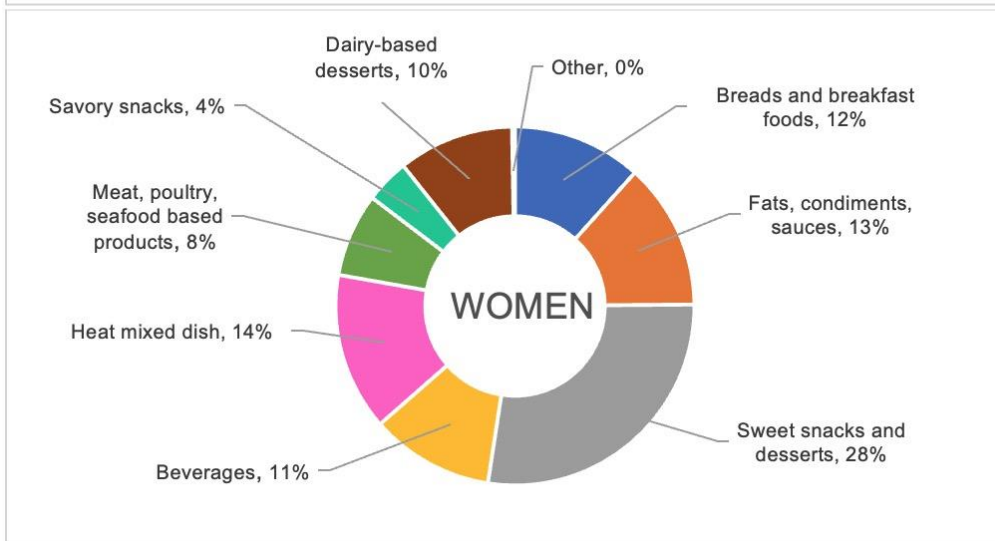



# Supplementary Figure C. Restricted spline analysis of ultra-processed food consumption (serving/day) and mortality

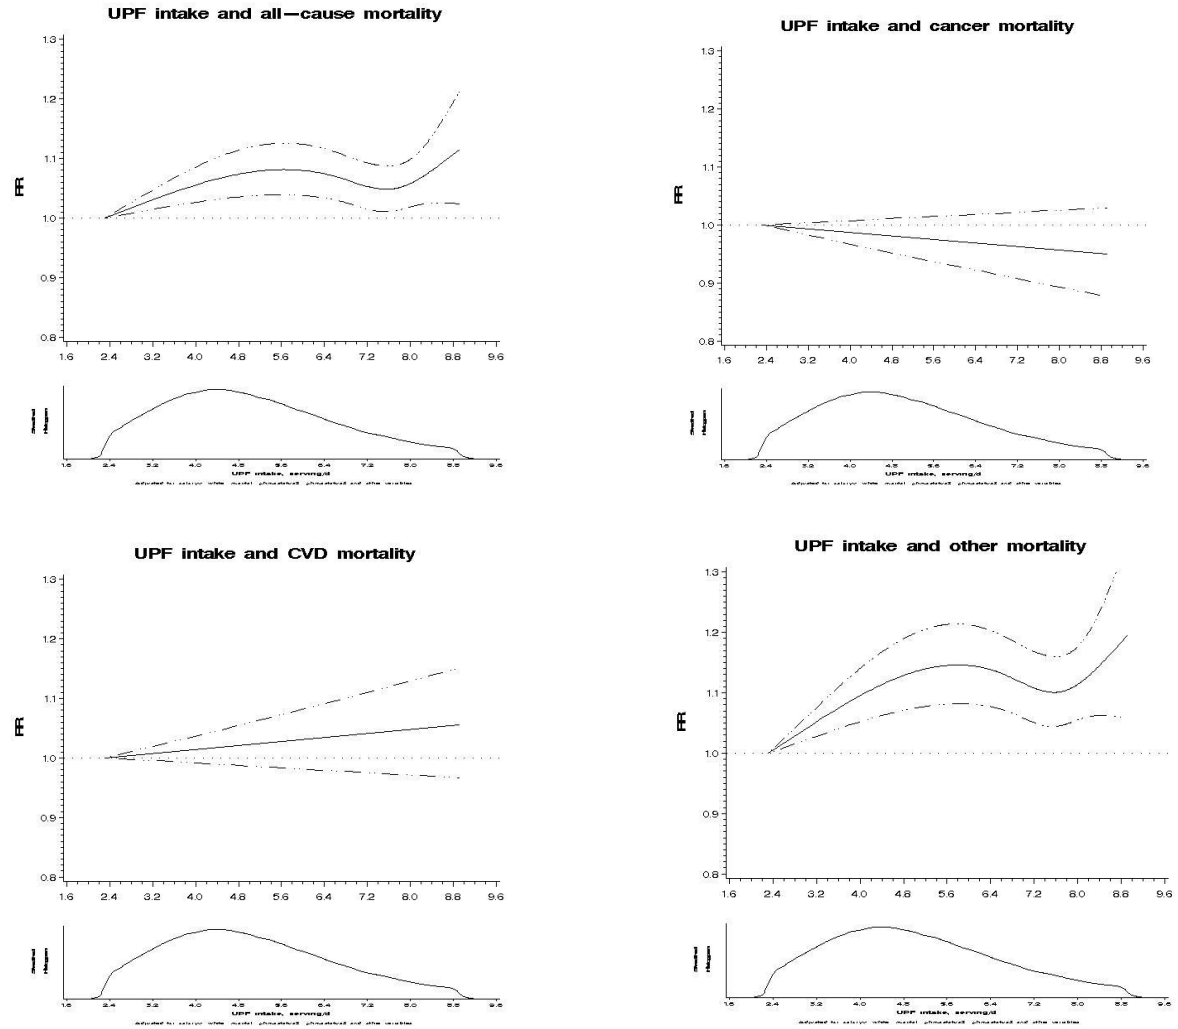

UPF intake and respiratory mortality

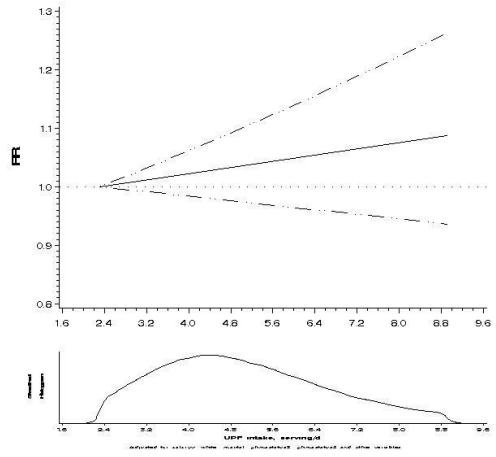

UPF intake and neurodegenerative mortality

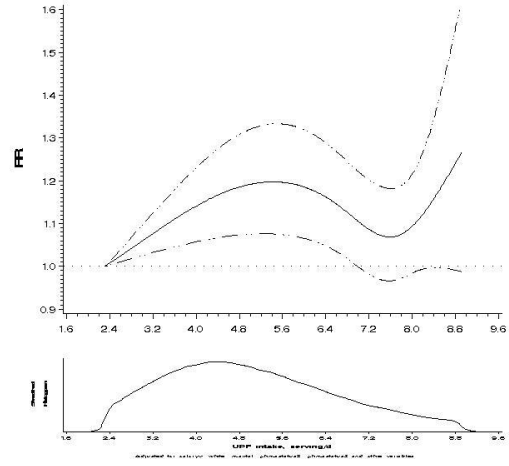

Supplementary Figure D. The trend of energy-adjusted ultra-processed food consumption (serving/day) by year

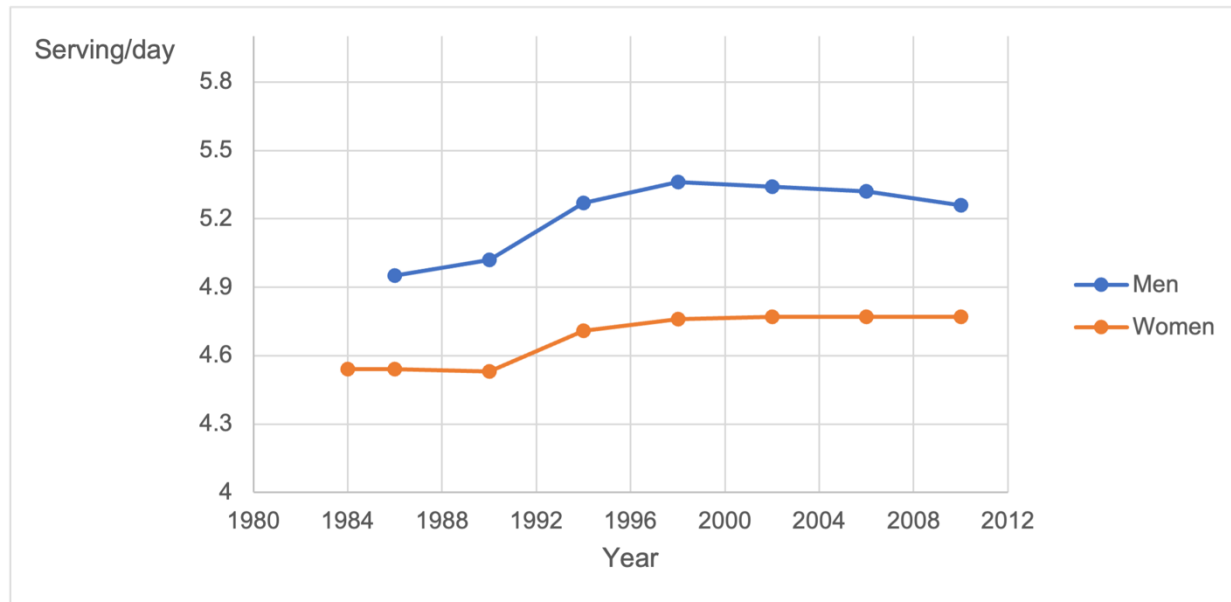

**Supplementary Figure E. The trend of energy-adjusted consumption of ultra-processed food subgroups (serving/day) by year**

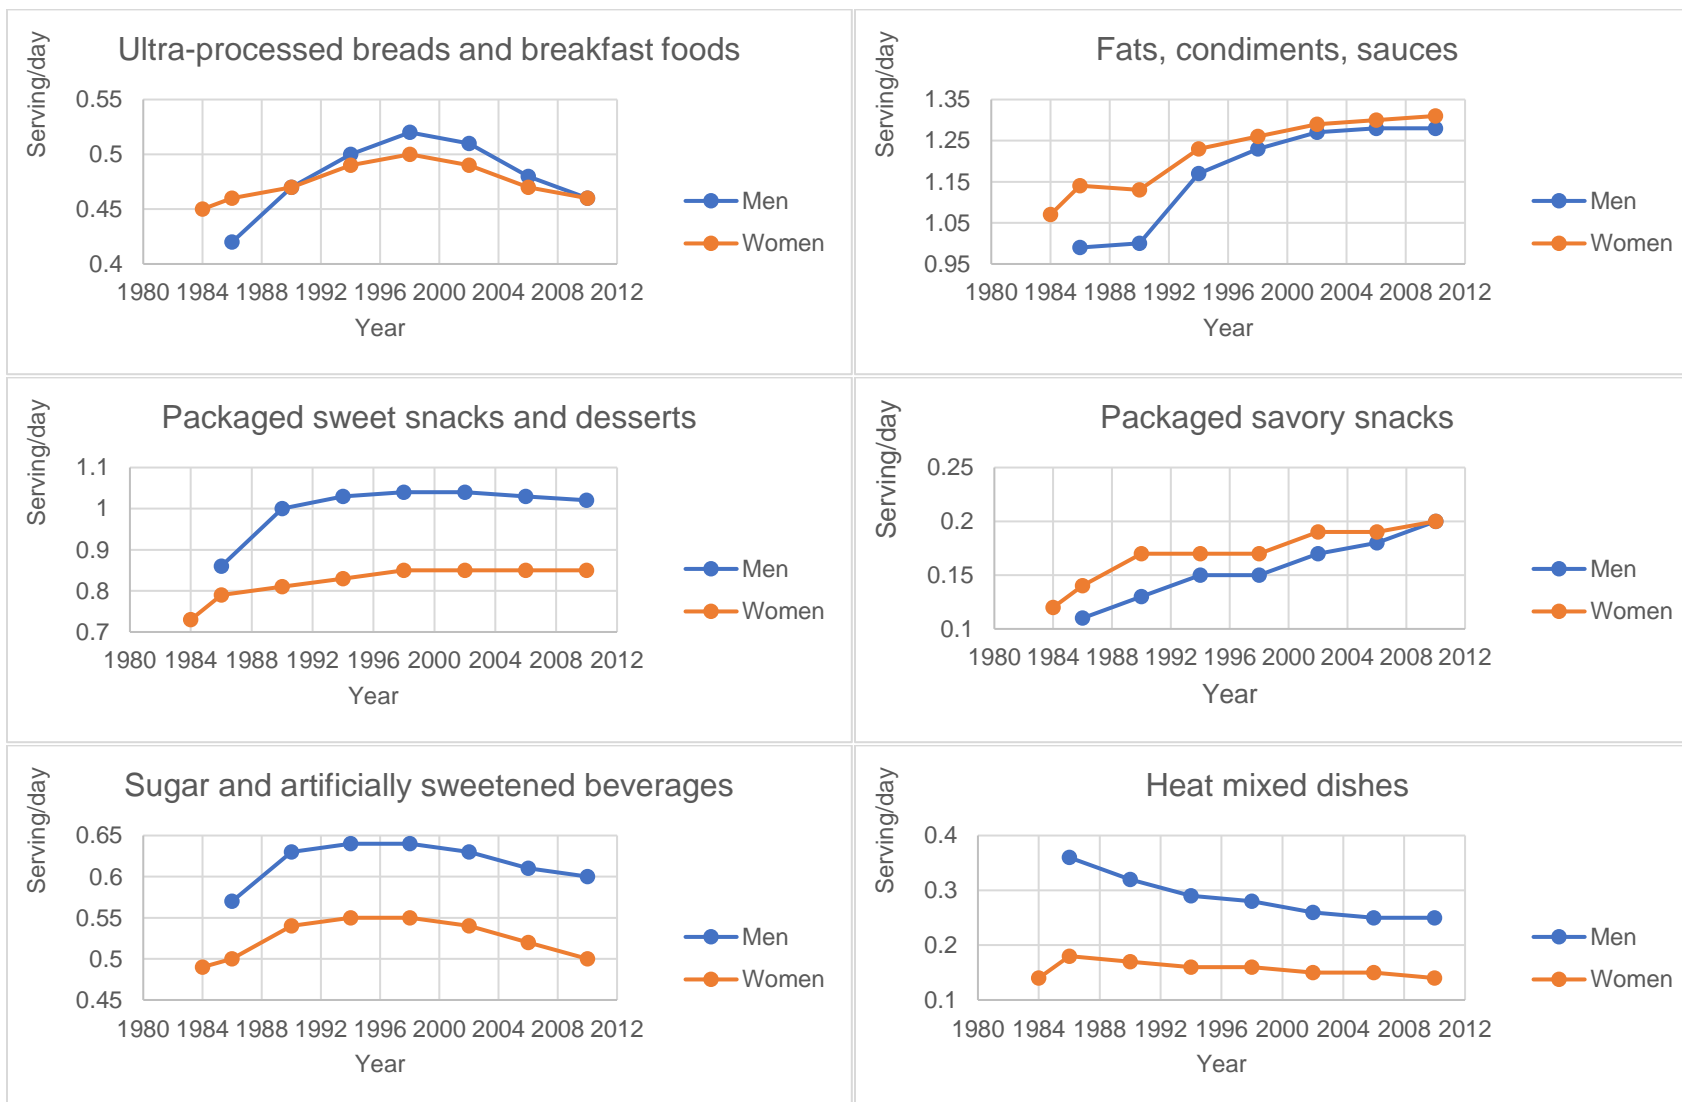

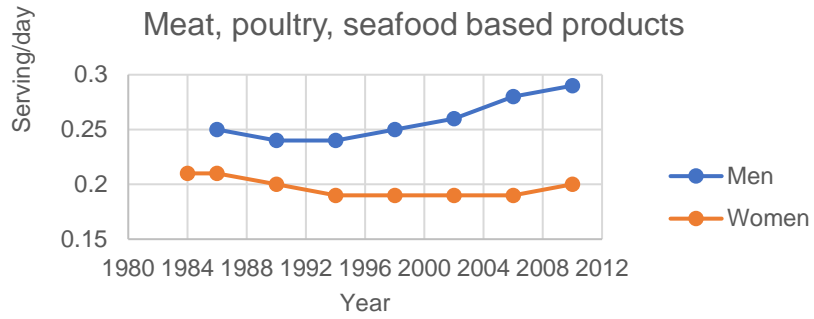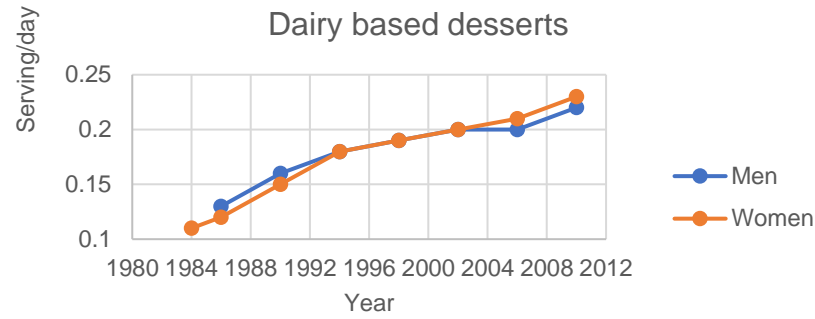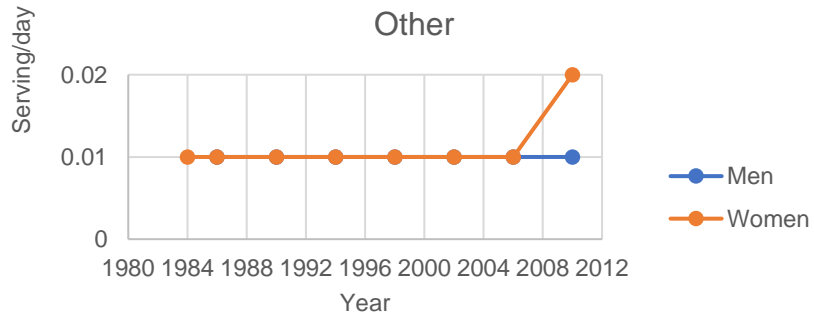

Supplement: fanz078476.ww1.pdf [file fanz078476.ww1.pdf]
